# Supplementary material
Source: PubMed Central journal article supplement (PMC6242336)
Supplement: NIHMS1508929-supplement-1.pdf [file NIHMS1508929-supplement-1.pdf]

Supplementary information

A Reverse Transcriptase-Cas1 Fusion Protein  
Contains a Cas6 Domain Required for Both  
CRISPR RNA Biogenesis and RNA Spacer Acquisition

Georg Mohr, Sukrit Silas, Jennifer L. Stamos,  
Kira S. Makarova, Laura M. Markham, Jun Yao, Patricia Lucas-Elío,  
Antonio Sanchez-Amat, Andrew Z. Fire, Eugene V. Koonin, Alan M. Lambowitz

This file includes Supplementary Figures S1 to S7, Table S2 and legends to Data S1, Data S2,  
and Table S1

Branch 1

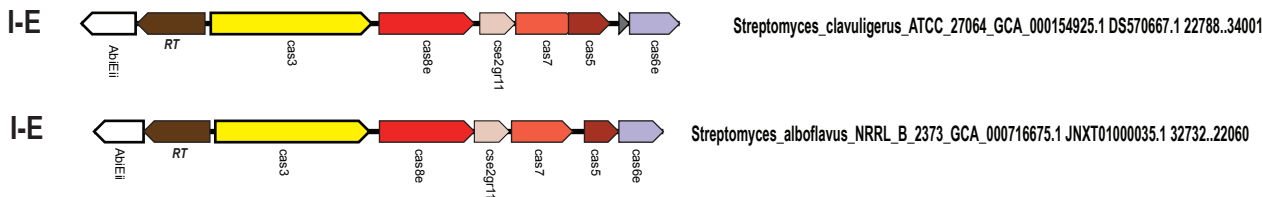

Branch 3

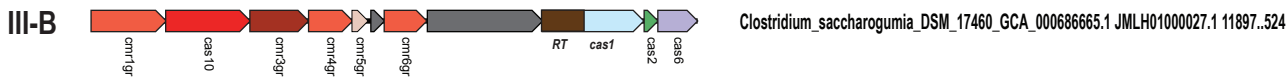

Branch 5

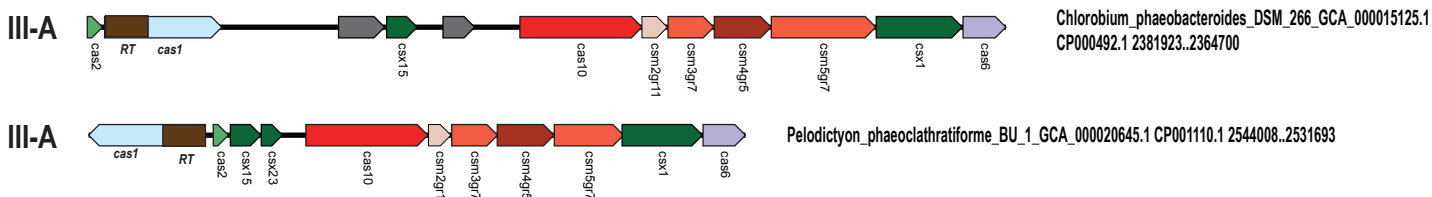

Branch 9

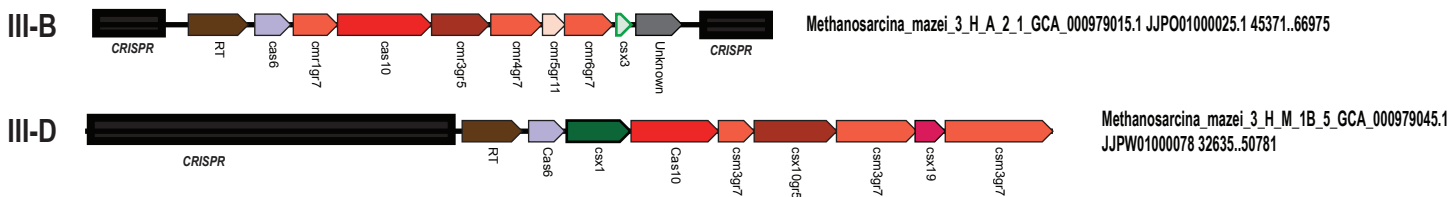

Branch 10

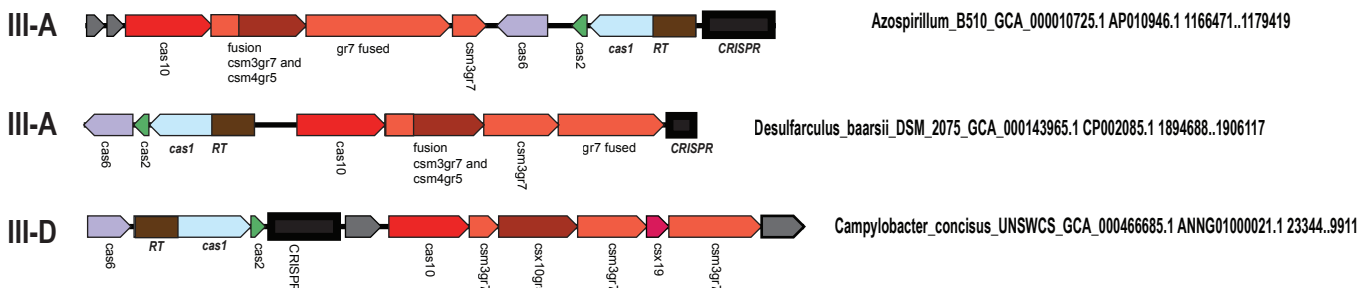

Branch 12

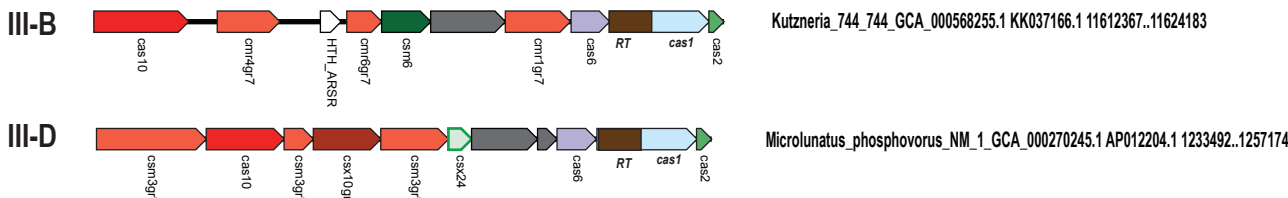

Branch 14

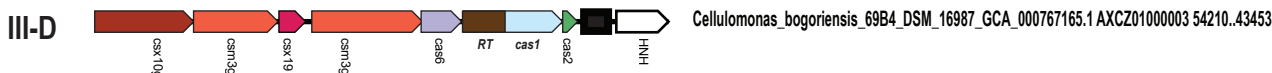

Branch 15

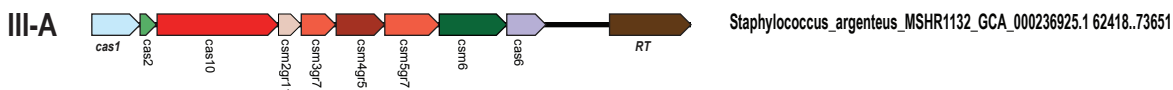

**Figure S1. Gene order in CRISPR RT-containing CRISPR loci, Related to Figure 1.**

The Figure shows additional representative examples of gene order in RT-containing CRISPR loci from branches 9 and 10 and from other branches for which gene order is not shown in Figure 1. Group II intron RTs, identified by conserved sequence motifs in the thumb/maturase domain and/or association with group II intron RNA secondary structure, RT fragments, and a branch 2 RT associated with Tn7 transposition machinery were excluded from the analysis. For each locus, species name, genome accession number, and the respective nucleotide coordinates are indicated. Genes are shown roughly to scale; CRISPR arrays are indicated as black rectangles. Homologous genes are color-coded, with the exception of numerous ancillary genes, which are all shown in light green and green outline, and unknown proteins are shown in gray. The gene names largely follow the established nomenclature (Makarova et al., 2015), but the RAMP proteins of groups 5 and 7 are denoted gr5 and gr7, respectively. The CRISPR-Cas system subtype is indicated for the loci encoding the respective effector genes.



**Figure S2. Cas6-RT-Cas1 fusion proteins, Related to Figure 1.**

(A) Alignment of Cas6-RT-Cas1 fusion proteins from *M. mediterranea* (Top, WP\_013659858.1) and *Tredinibacter tunerae* T8602 (WP\_028885416.1, WP\_028881221.1). The alignment was generated with CLUSTAL. Identical amino acids are shown in white with black background and similar amino acids are shown with grey background. Protein domains are demarcated with black lines. The conserved G-loop is indicated with a red box, and the Y/FADD motif 5 of the RT is indicated with a blue box. (B) Alignment of Cas6-RT-Cas1 fusion proteins from *M. mediterranea* (Top, WP\_013659858.1) and *Porphyronomas sp.* (*P. gulae* WP\_018964676.1, *P. gingivalis* WP\_013815267.1, *P. crevioricanis* WP\_023938229.1, *P. gingivicanis* WP\_036885018.1, *P. loveana* PVZ12739.1, and Bacteroidetes bacterium PID94761.1) The alignment was generated with JNET and refined manually.

Cas6

Branch 10  
subtree

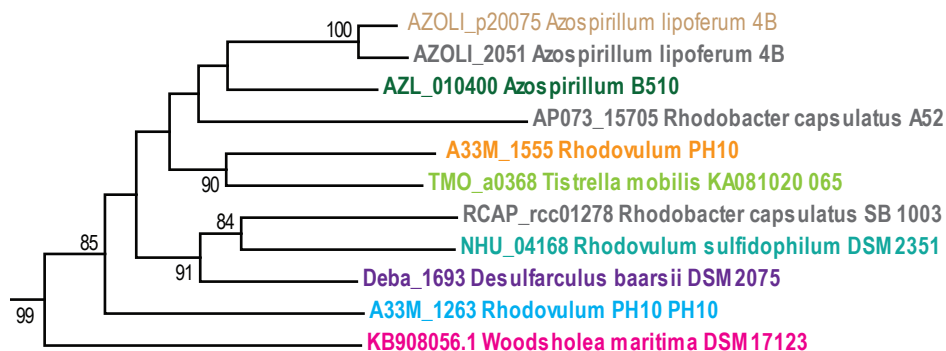

This work

Cas1

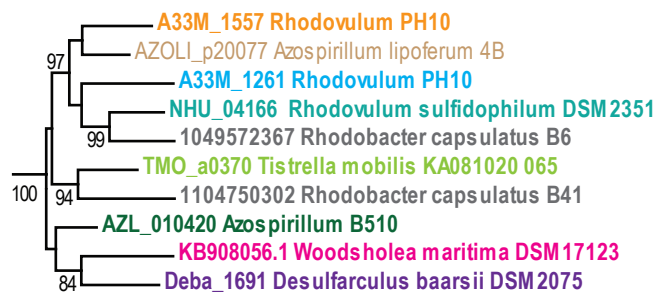

Silas et al, 2017

RT

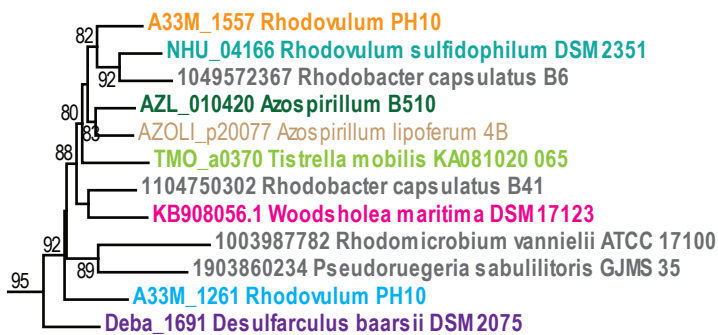

Silas et al, 2017

**Figure S3. Parallel evolution of Cas6 and RT-Cas1 fusion proteins, Related to Figure 1.**

Distinct, strongly supported subtrees extracted from the respective phylogenetic trees are shown for Cas6 (Branch 10) and the RT and Cas1 domains of the corresponding RT-Cas1 proteins (Silas et al., 2017b). The bootstrap support values for the internal branches are shown as percentages. Proteins encoded in the same locus are shown by the same color (gray branches denote the same species but different strains, due to random selection of representatives in the tree and incompleteness of some of the genomic sequences). The figure shows that, despite the absence of the physical fusion of Cas6 with RT-Cas1 and extensive shuffling of Cas6 genes within CRISPR-cas loci, the topologies of the three trees are largely congruent, indicating an early origin of the functional link between Cas6 and RT-Cas1.

**A**

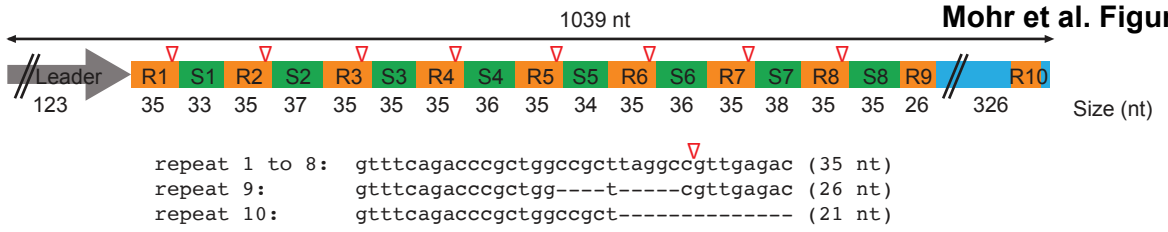

**B**

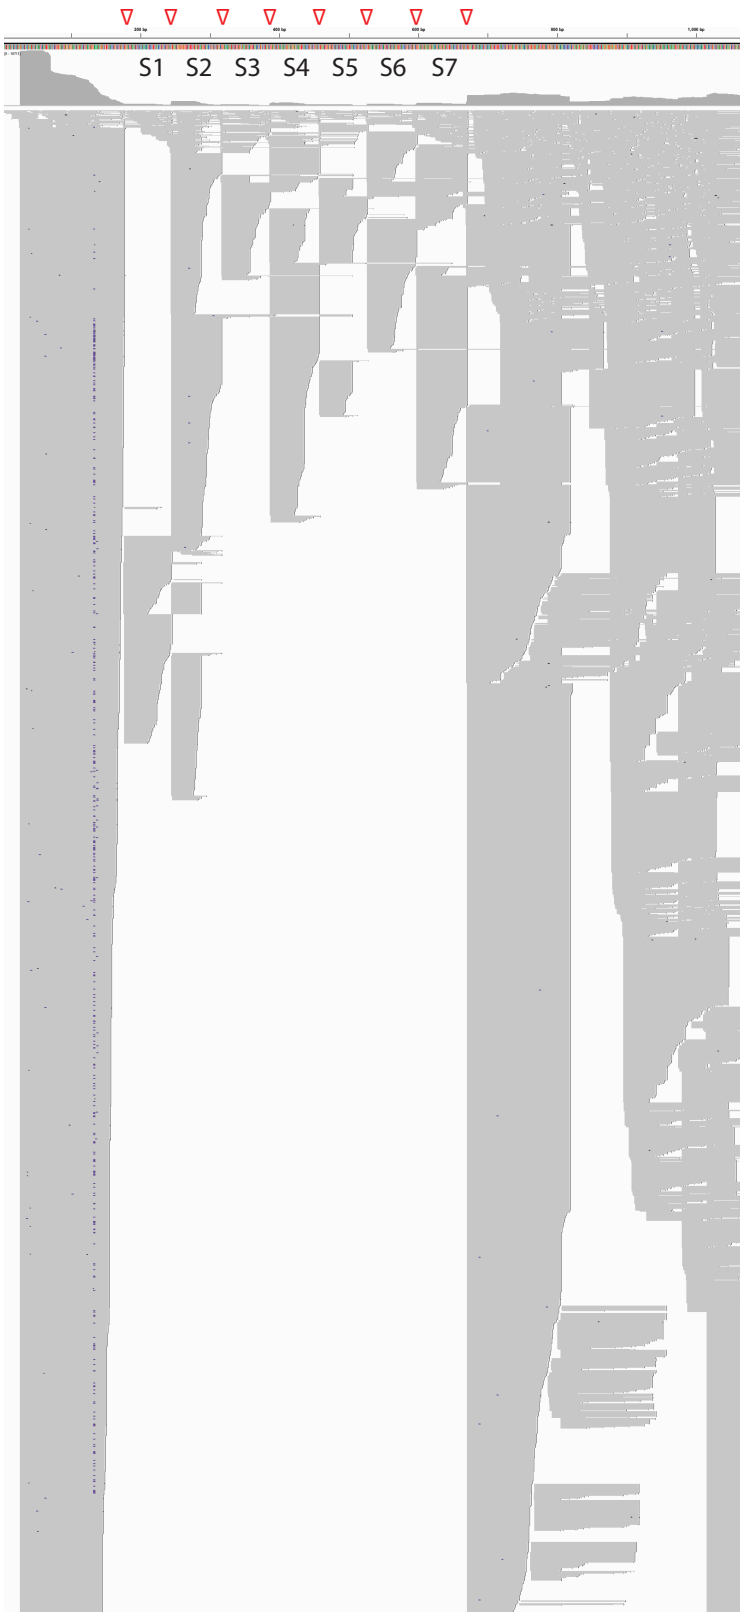

**C**

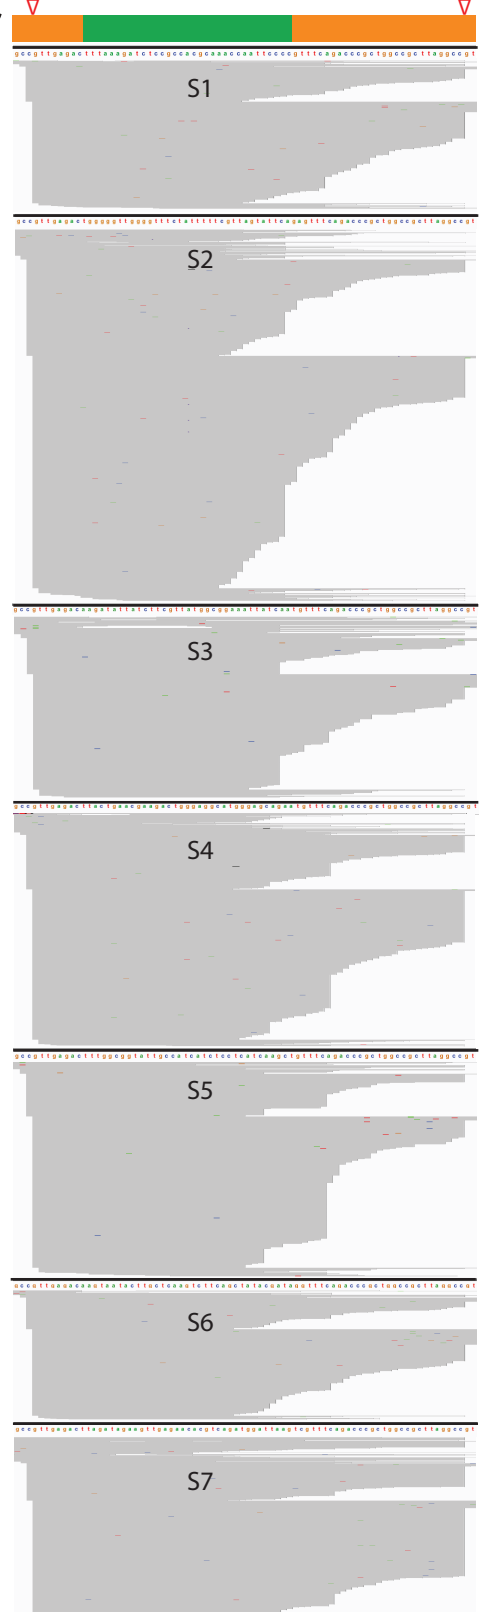



**Figure S4. RNA-seq of MMB-1 CRISPR RNAs Processed by Cas6-RT-Cas1 *In Vitro*, Related to Figure 2.**

(A) Schematic showing the full-length MMB-1 CRISPR03 array transcript used as a substrate for assaying Cas6 activity (redrawn from Figure 2). *In vitro* transcribed CRISPR03 RNA was incubated with WT Cas6-RT-Cas1 protein at 37°C for 1 hr. High-throughput sequencing libraries were prepared from purified reaction products using the TGIRT-seq protocol, as described (Nottingham et al., 2016). (B) RNA-seq reads aligned to the CRISPR03 sequence. Red triangles indicate matching 5' and 3' ends for the first 8 full CRISPR repeats. (C) Close up of reads mapped to individual crRNAs. The schematic at the top shows repeats in orange and spacers in green, red triangles indicate upstream and downstream cleavage sites.

**A**

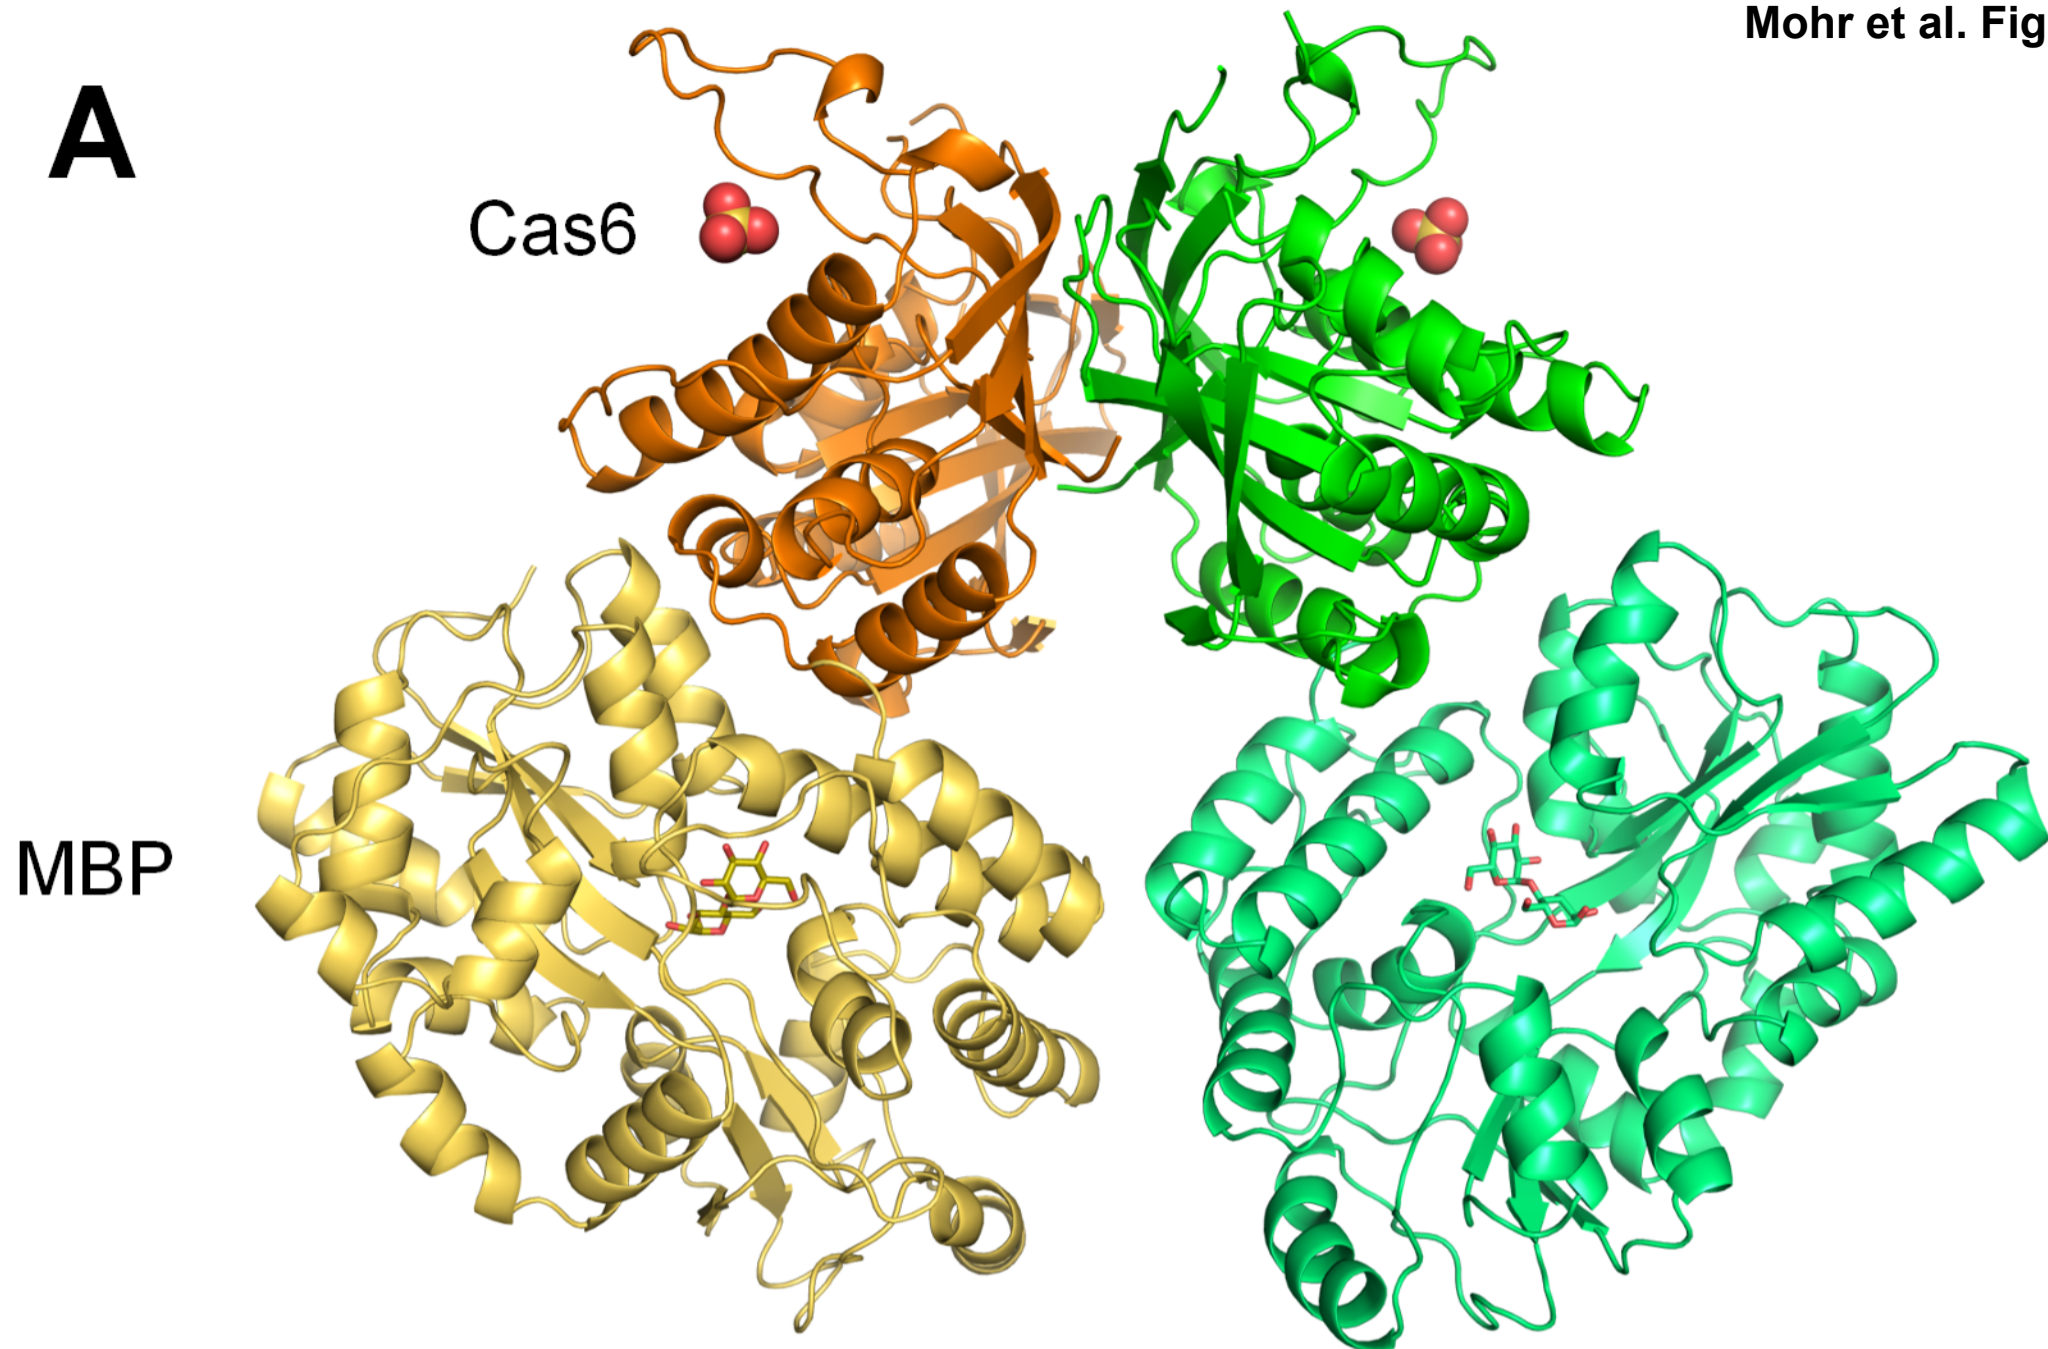

**B**

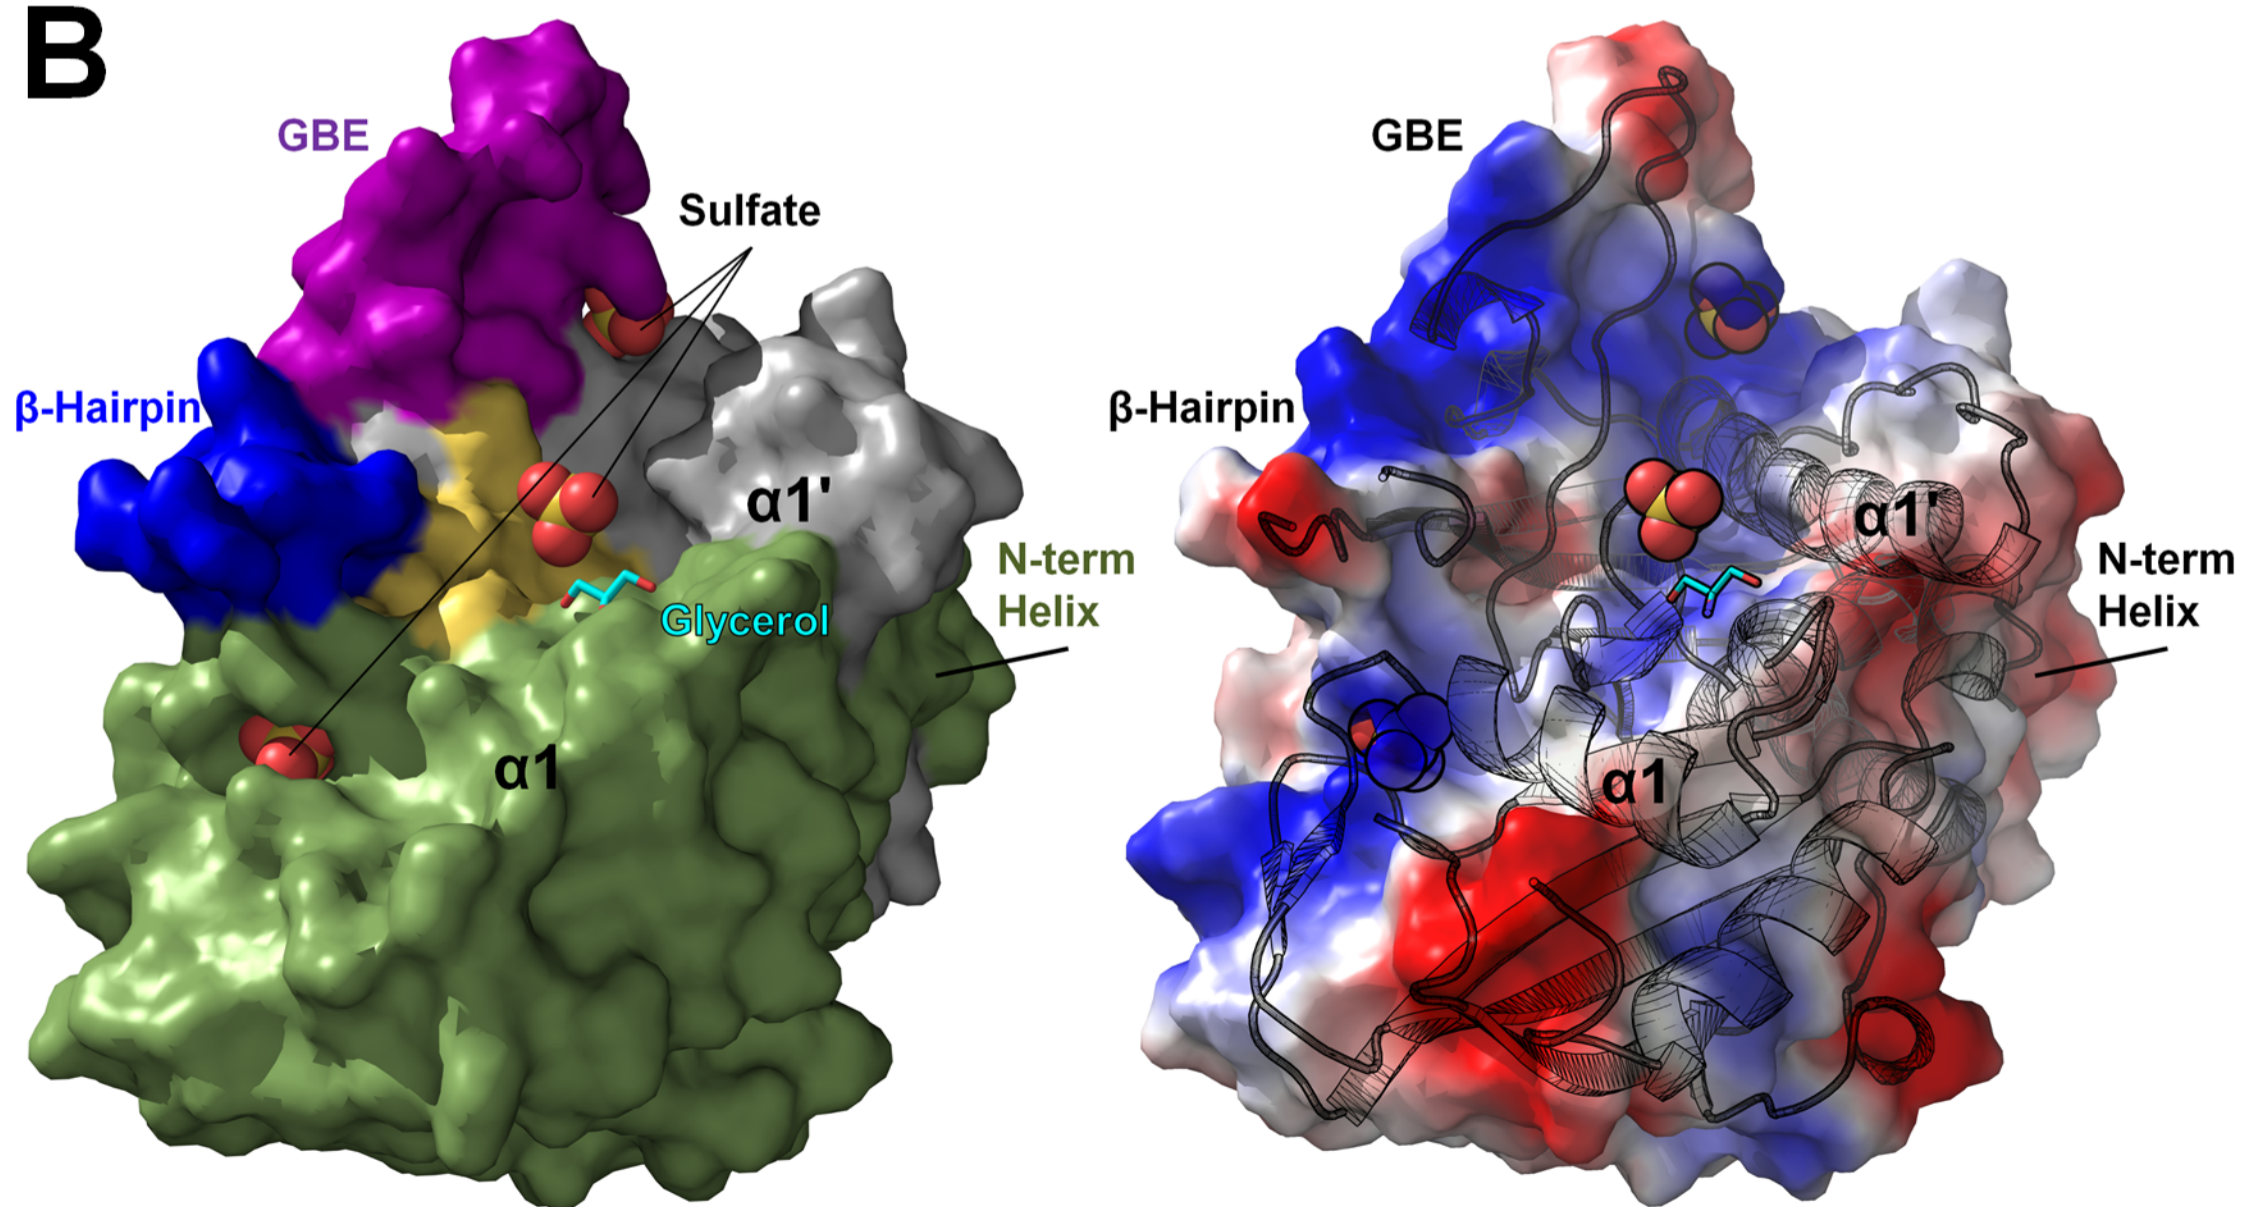

**Figure S5. Crystallographic Dimer and Surface Features of the MMB-1 Cas6 crRNA Stem-Loop-Binding Face, Related to Figure 3.**

(A) Contents of the asymmetric unit of the crystal structure, showing two MBP-MMB-1 Cas6 fusion proteins in orange and green, with the MBP portions in yellow and light green (maltose, stick form; sulfate ions, sphere representation). (B) Surface representation of the putative crRNA stem-loop binding region of MMB-1 Cas6, displaying a series of ordered sulfates (spheres) and a glycerol molecule (cyan stick) bound along a positively charged trench bordered on one side by the GBE and  $\beta$ -hairpin and on the other side by portions of the  $\alpha$ 1 and  $\alpha$ 1'-helices. *left*, colors as in Figure 3B; *right*, electrostatic surface potential, colors as in Figure 3C.

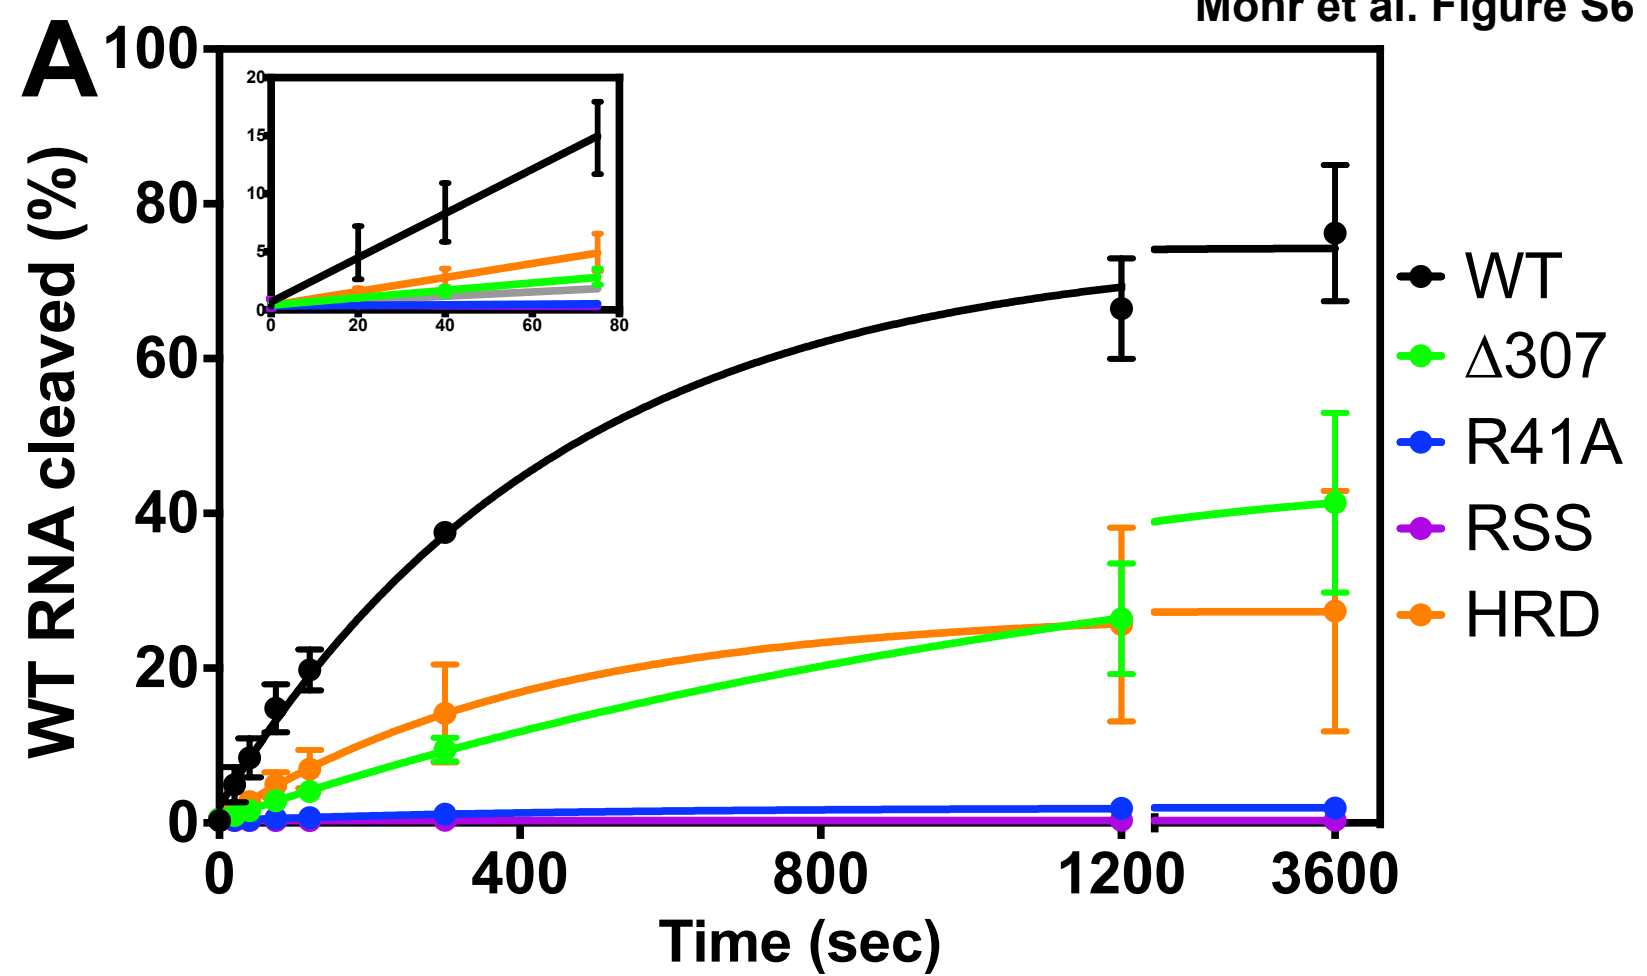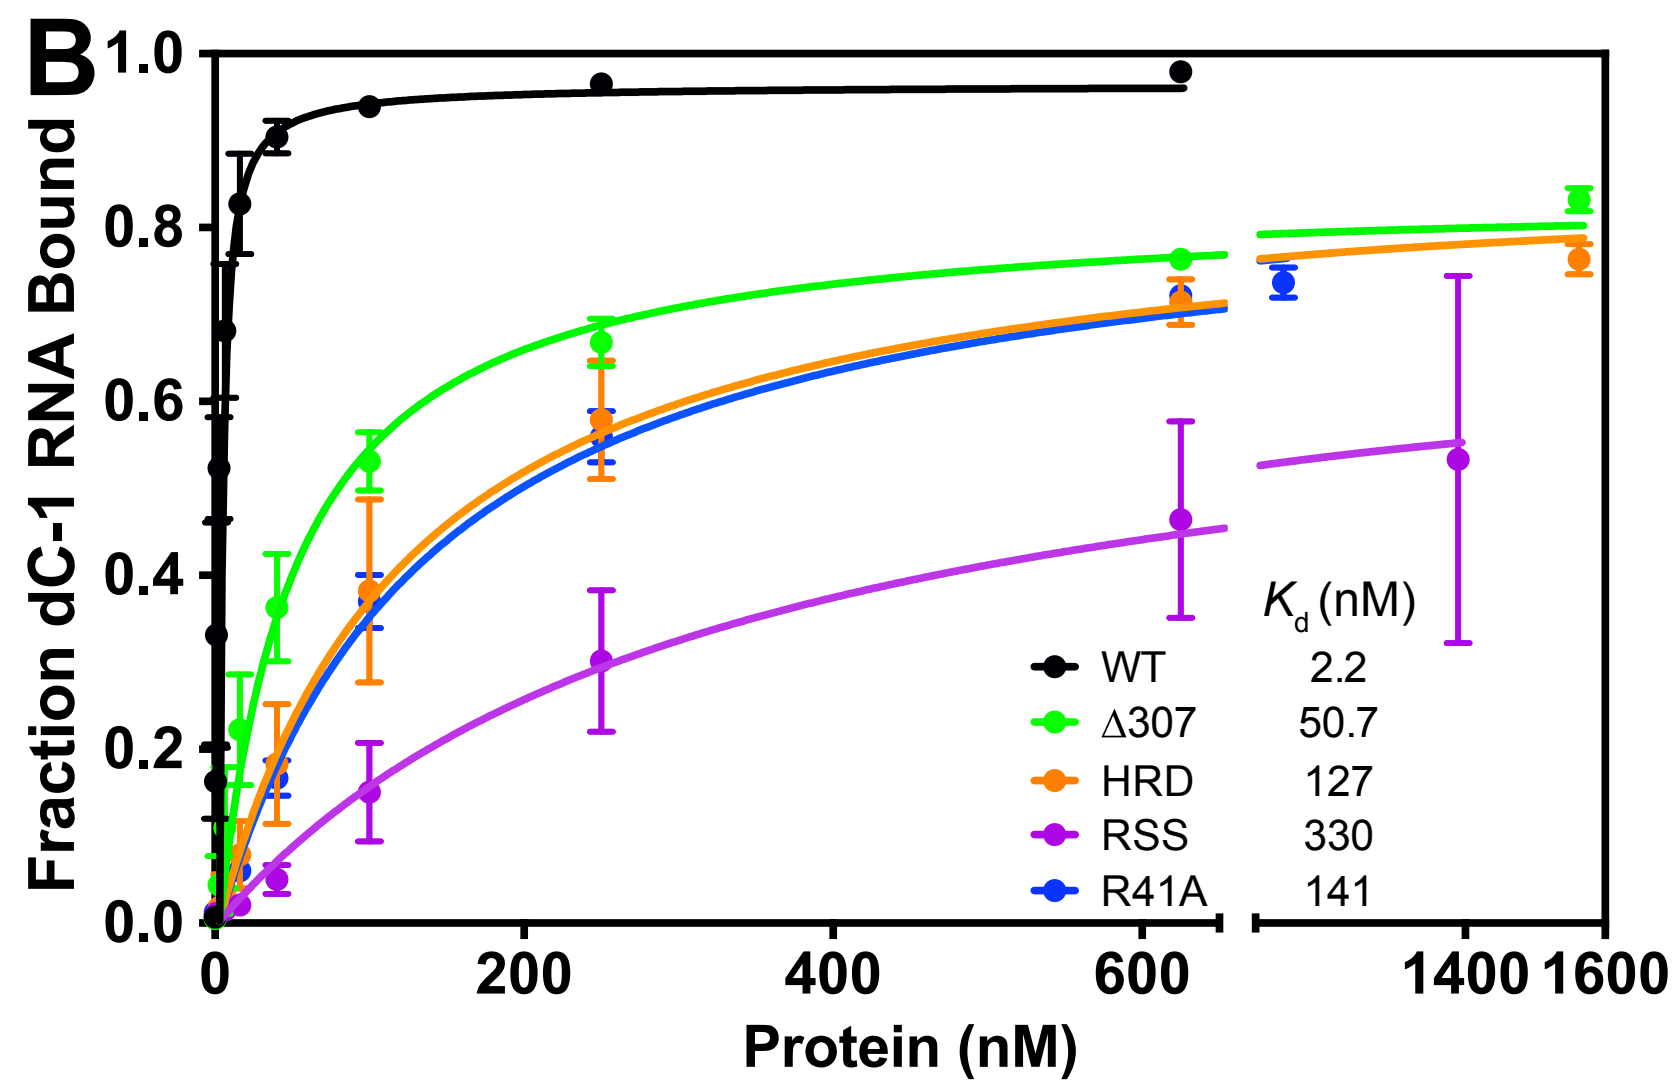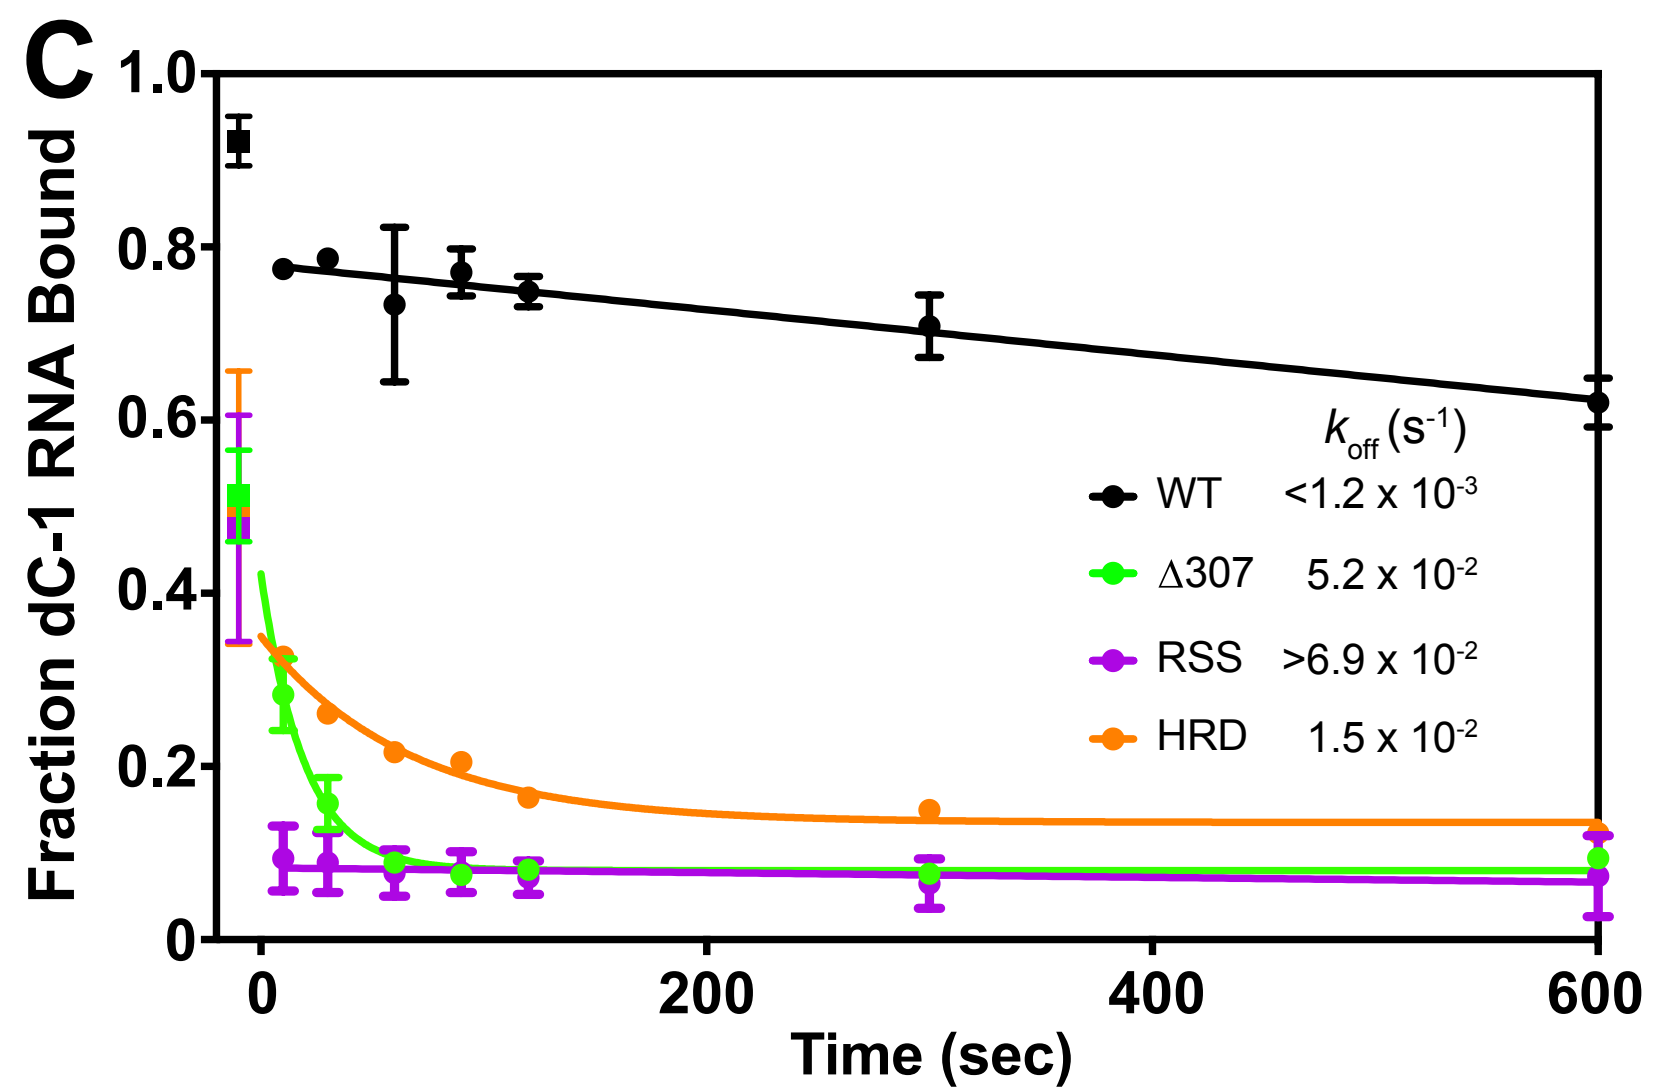

**Figure S6. Assays of Cas6 Activity Under Excess RNA Conditions and Binding of Pre-crRNA Repeat by WT and Mutant Cas6-RT-Cas1 Proteins, Related to Figure 4.**

(A) Pre-crRNA cleavage assay under excess RNA conditions. A 5' <sup>32</sup>P-labeled 35-nt RNA oligonucleotide (1  $\mu$ M) consisting of the WT CRISPR repeat was incubated with WT and mutant Cas6-RT-Cas1 proteins (40 nM) for times up to 1 hr (3,600 sec), and the products were analyzed on a denaturing 12% polyacrylamide gel. The data were fit to a single exponential model. The inset shows the initial time points with a pseudo-linear fit. (B) Equilibrium binding assay. The non-cleavable 5' <sup>32</sup>P-labeled dC-1 RNA oligonucleotide (0.5 nM) was incubated with Cas6-RT-Cas1 mutant proteins at various concentrations (0 to 1,525 nM) for 5 min at 37°C, and protein-bound RNA was measured by nitrocellulose filter binding, as described in STAR Methods. Data were fit to a one-site specific binding model and the  $K_d$  values were obtained from the fit, as described in STAR Methods. (C) Complex dissociation ( $k_{off}$ ) assay. 5' <sup>32</sup>P-labeled dC-1 RNA oligonucleotide (2 nM) was incubated with the indicated WT or mutant Cas6-RT-Cas1 protein (1  $\mu$ M) for 5 min on ice followed by 5 min at 37°C. An initial sample was removed and used to ascertain the amount of protein-bound RNA (squares on the left). The remainder was immediately diluted with an equal volume of buffer containing excess (5  $\mu$ M) dC-1 oligonucleotide. Samples were taken successively from each reaction for up to 10 min and quantified by nitrocellulose filter binding, as described in STAR Methods. Data for WT Cas6-RT-Cas1 and the RSS mutant were fit to a line, and data for the  $\Delta$ 307-957 and HRD mutants were fit to a single exponential model.

Data shown represent three technical repeats.

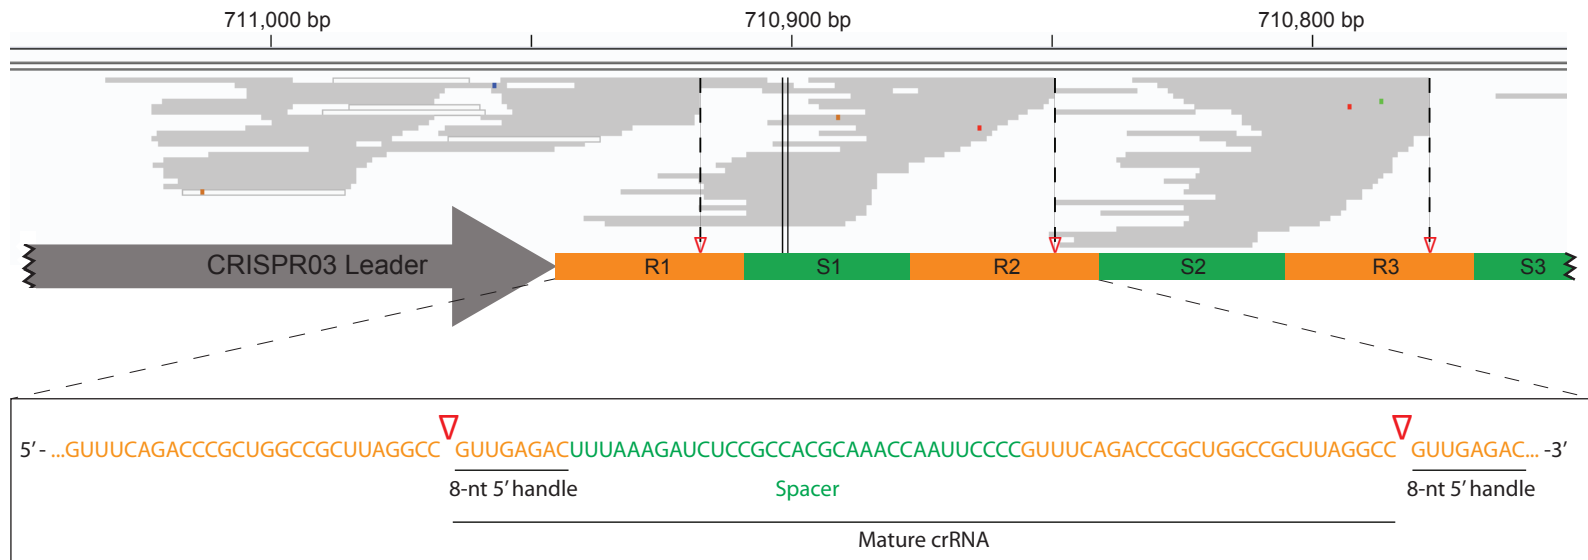

**Figure S7. RNA-seq of MMB-1 CRISPR RNAs Processed by Cas6-RT-Cas1 *In Vivo*, Related to Figure 5.**

The expected pre-crRNA processing site 8-nt upstream of the 3' end of the CRISPR03 direct repeat sequence was observed in total RNA sequencing libraries of WT MMB-1. RNA-seq reads were mapped to the genomic copy of the CRISPR03 array with CRISPR features indicated in the schematic below. Dotted lines with red triangles indicate Cas6 cleavage sites. The bottom shows the sequence of the first native repeat-spacer-repeat unit of the pre-crRNA (orange), with the experimentally determined cleavage sites marked by red triangles. Colored short horizontal bars in the reads indicate sequence variation from the genomic sequence. The two parallel vertical lines in the center indicate the size of a single nucleotide.

|                                                                                                                                                       |                             |                   |
|-------------------------------------------------------------------------------------------------------------------------------------------------------|-----------------------------|-------------------|
| Forward primer for spacer amplification:<br>CGACGCTCTCCGATCTNNNNNCTGAAATGATTGGAAAAATAAGG                                                              | Andrew Fire                 | Silas et al. 2016 |
| Reverse primer for spacer amplification: ACTGACGCTAGTGCATCACGTGGCGGAGATCTTTAA                                                                         | Andrew Fire                 | Silas et al. 2016 |
| Illumina forward barcoding primer:<br>CAAGCAGAAGACGGCATACGAGATNNNNNNNGTGACTGGAGTTCAGACGTGTGCTCTTCCGATCA<br>CTGACGCTAGTGCATCA where <u>N8</u> is index | Andrew Fire                 | Silas et al. 2016 |
| Illumina reverse barcoding primer:<br>AATGATACGGCGACCACCGAGATCTACACNNNNNNNACACTCTTCCCTACACGACGCTCTTCCGAT<br>CT where <u>N8</u> is index               | Andrew Fire                 | Silas et al. 2016 |
| Pre-adenylated 3' adapter oligo: /5rApp/NNNNNAGATCGGAAGAGCACACGTCT/3ddC/                                                                              | Andrew Fire                 | Silas et al. 2018 |
| Reverse transcription primer:<br>/5Phos/AGATCGGAAGAGCGTCGTG/Isp18/CACTCA/Isp18/GTGACTGGAGTTCAGACGTGTGCTCT<br>TCCGATCT                                 | Andrew Fire                 | Silas et al. 2018 |
| Universal PCR primer:<br>AATGATACGGCGACCACCGAGATCTACACTCTTCCCTACACGACGCTCTTCCGATCT                                                                    | Andrew Fire                 | Silas et al. 2018 |
| Indexing primers:<br>CAAGCAGAAGACGGCATACGAGATNNNNNNNGTGACTGGAGTTCAGACGTGTGCTCTTCCG where<br><u>N6</u> is index                                        | Andrew Fire                 | Silas et al. 2018 |
| MMB_repeat, rGrUrUrCrArGrArCrCrGrCrUrGrGrCrCrGrUrUrArGrCrCrGrUrUrGrArGrArC                                                                            | This paper                  | N/A               |
| MMB_repeat_DNA, GTTTCAGACCCGCTGGCCGCTTAGGCCGTTGAGAC                                                                                                   | This paper                  | N/A               |
| MMB_repeat_dC-1, rGrUrUrCrArGrArCrCrGrCrUrGrGrCrCrGrUrUrArGrCrCdCrGrUrUrGrArGrArC                                                                     | This paper                  | N/A               |
| MMB_repeat_StemFlip, rGrUrUrCrArGrArCrCrGrCr<br>rUrCrCrGrGrCrUrUrArCrCrGrGrUrUrGrArGrArC                                                              | This paper                  | N/A               |
| MMB_full_UGU>CUG, rGrUrUrCrArGrArCrCrGrCr rGrGrCrCrGrCrUrUrArGrCrCrUrCrUrGrArGrArC                                                                    | This paper                  | N/A               |
| MMB_repeat_27nt_cleaved, rGrUrUrCrArGrArCrCrGrCrUrGrGrCrCrGrUrUrArGrGrCrC                                                                             | This paper                  | N/A               |
| MMB_repeat_8nt_cleaved, rGrUrUrGrArGrArC                                                                                                              | This paper                  | N/A               |
| Spacer, rArGrCrGrUrGrCrGrUrUrCrArGrArCrArUrUrCrArGrCrCrUrCrUrArGrUrArGrA                                                                              | This paper                  | N/A               |
| MMB1crisp5b, CACTCGACCGGAATTATCGACGAA                                                                                                                 | Integrated DNA Technologies | Silas et al. 2016 |
| MMB1crisp5b+T75', ATGAATTCGTAATACGACTCACTATAGGGCACTCGACCGGAATTATCGACGAA                                                                               | Integrated DNA Technologies | This paper        |
| MMB1crisp3full, CTAGCTCTCGAGAGGCCTTCGTCA                                                                                                              | Integrated DNA Technologies | This paper        |
| MMB1crisp3, TCTGAACTCTGAATACTAACGAAAAATAG                                                                                                             | Integrated DNA Technologies | Silas et al. 2016 |



**Table S2. Oligonucleotides Used in This Study, Related to KEYRESOURCES Table.**

**Table S1. Cas6 Sequence Information, Related to Figure 1.**

The table includes information on species name, nucleotide and protein accession numbers, Cas6 protein lengths, Cas6 position and branch in the tree, subtype of the associated CRISPR-Cas system and presence of RT domain in the same locus.

**Data S1. Cas6 Phylogenetic Tree in the Newick Format, Related to Figure 1.**

This tree is schematically shown in Figure 1. The Newick format is compatible with any tree viewing software.

**Data S2. Cas6 Genomic Loci Annotation, Related to Figure 1.**

The table includes detailed information on *cas6* loci. This information is provided for *cas6* representatives including all those that were used for phylogenetic analysis (see Figure 1, Table S1 and Data S1).
